# Supplementary material for: Highly reversible Na ion storage in N-doped polyhedral carbon-coated transition-metal chalcogenides by optimizing the nanostructure and surface engineering
Source: Royal Society of Chemistry journal article supplement (doi:10.1039/c8ta07790h), 2018-01-01
Supplement: c8ta07790h1.pdf [file c8ta07790h1.pdf]

## Supporting Information

### Highly Reversible Na-ion Storage in N-doped polyhedral Carbon-Coated Transition-metal chalcogenides by Optimizing Nanostructure and Surface Engineering

Yuelel Pan<sup>a</sup>, Xudong Cheng<sup>a\*</sup>, Lunlun Gong<sup>a</sup>, Long Shi<sup>b</sup>, Yurui Deng<sup>a</sup>, Heping Zhang<sup>a\*</sup>

<sup>a</sup> State Key Laboratory of Fire Science, University of Science and Technology of China, Hefei, Anhui 230027, PR China

<sup>b</sup> Civil and Infrastructure Engineering Discipline, School of Engineering, RMIT University, Melbourne, VIC 3001, Australia

The file includes Figure S1-S7 and Table S1.

---

Corresponding author.

\* (X.C.) E-mail address: [chengxd@ustc.edu.cn](mailto:chengxd@ustc.edu.cn)

\* (H.Z.) E-mail address: [zhanghp@ustc.edu.cn](mailto:zhanghp@ustc.edu.cn)

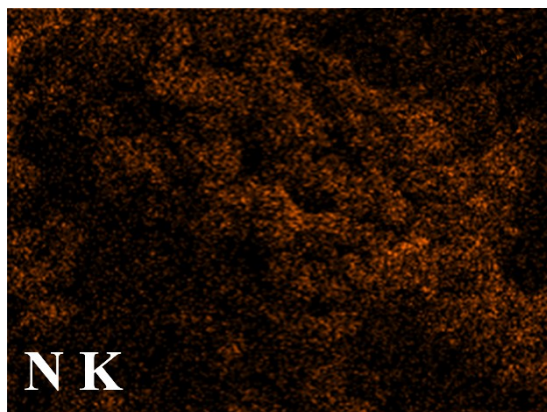

**Fig. S1** EDX elemental mapping of N.

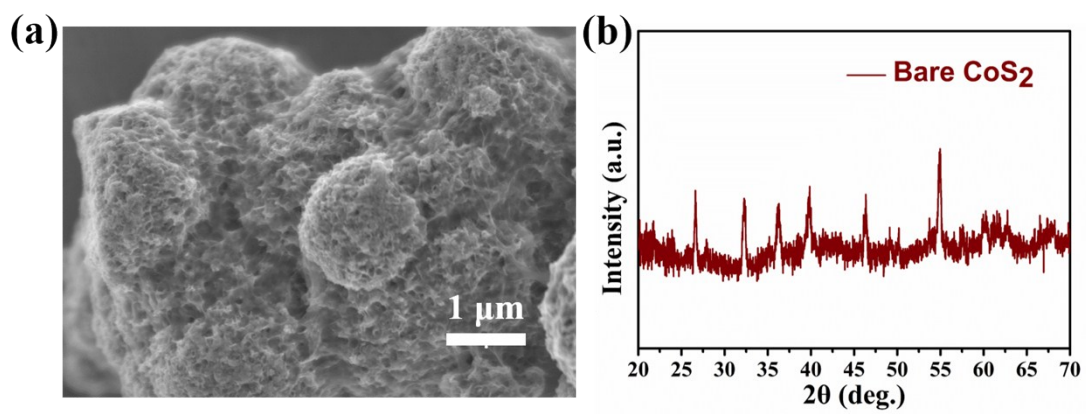

**Fig. S2** SEM image (a) and XRD patterns (b) of bare CoS<sub>2</sub>.

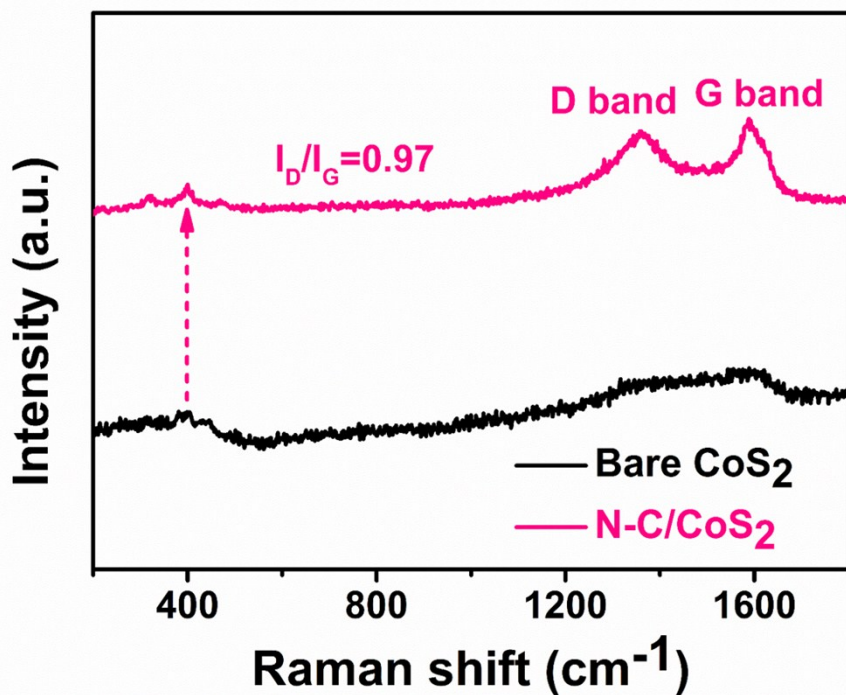

Fig. S3 Raman spectra of bare CoS<sub>2</sub> and N-CoS<sub>2</sub>@C.

**Table S1** Carbon, sulfur, nitrogen and cobalt atomic contents from XPS.

| Name | Start BE | Peak BE | End BE | FWHM eV | Atomic % |
|------|----------|---------|--------|---------|----------|
| S2p  | 172.08   | 163.23  | 157.08 | 3.2     | 21.76    |
| Co2p | 788.08   | 778.96  | 761.08 | 3.19    | 42.64    |
| C1s  | 293.08   | 285.14  | 281.08 | 3.05    | 20.97    |
| N1s  | 405.08   | 399.38  | 396.08 | 3.54    | 14.63    |

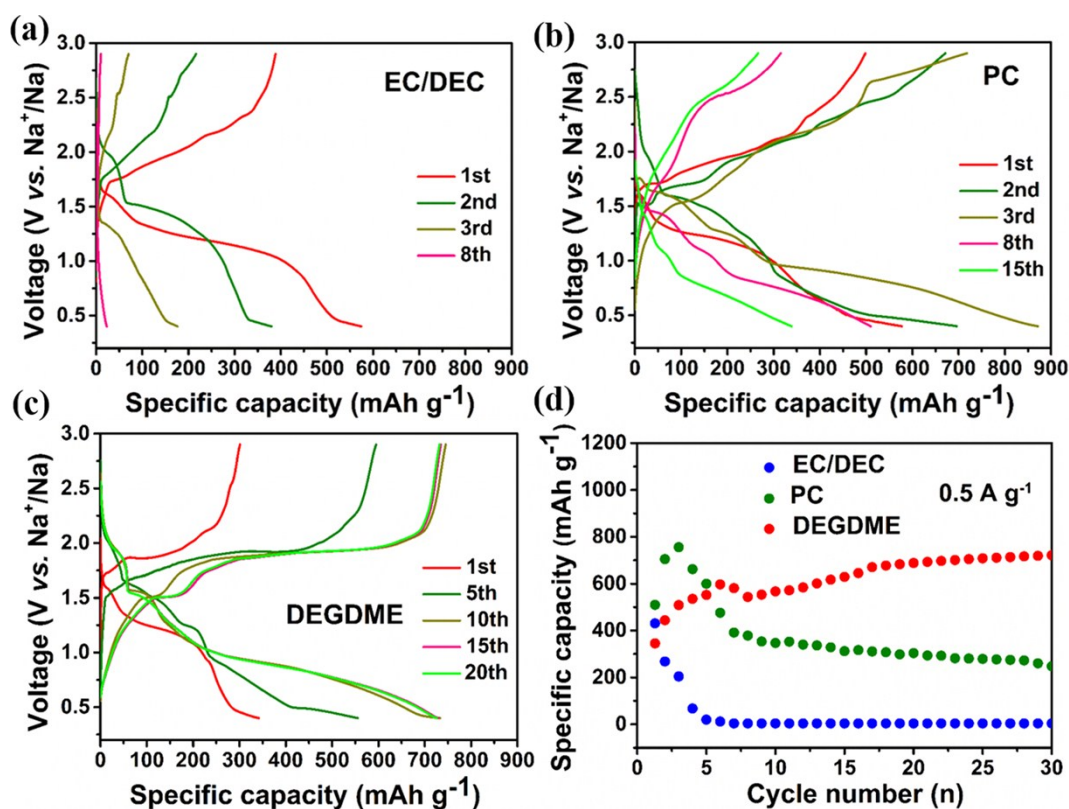

**Fig. S4** Charge-discharge curves of N-CoS<sub>2</sub>@C electrodes using 1 M NaCF<sub>3</sub>SO<sub>3</sub> in (a) EC/DEC, (b) PC, (c) DEGDME at 0.5 A g<sup>-1</sup> in potential range of 0.4-2.9 V and (d) cycling performance in the three different solvents.

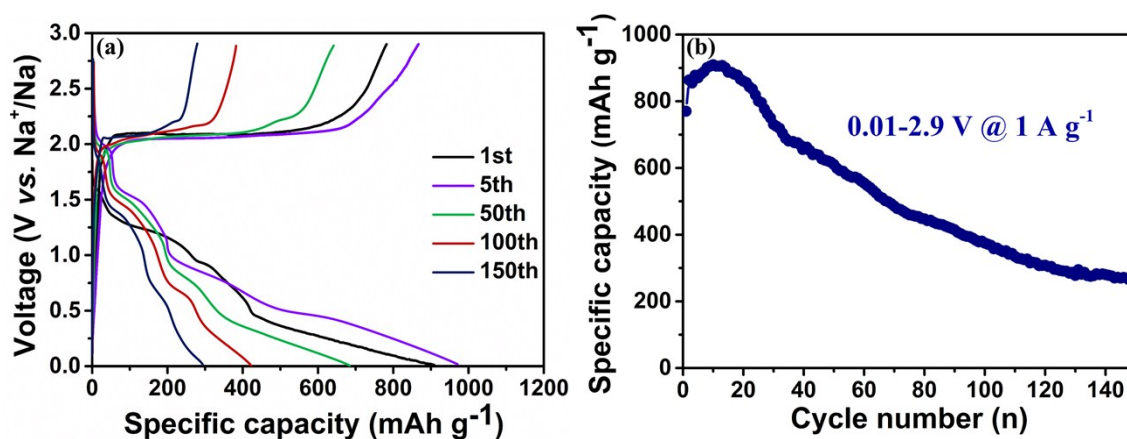

**Fig. S5** (a) Charge-discharge curves and (b) long-cycling performance of N-CoS<sub>2</sub>@C electrodes with a voltage ranging 0.01 V to 2.9 V.

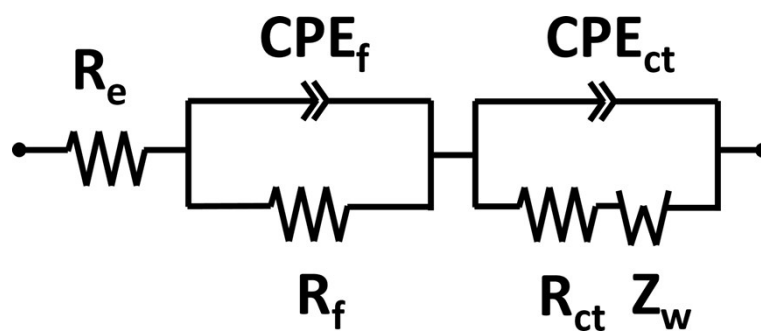

**Fig. S6** The fitted plot of electrochemical impedance spectra by Randles equivalent circuit.

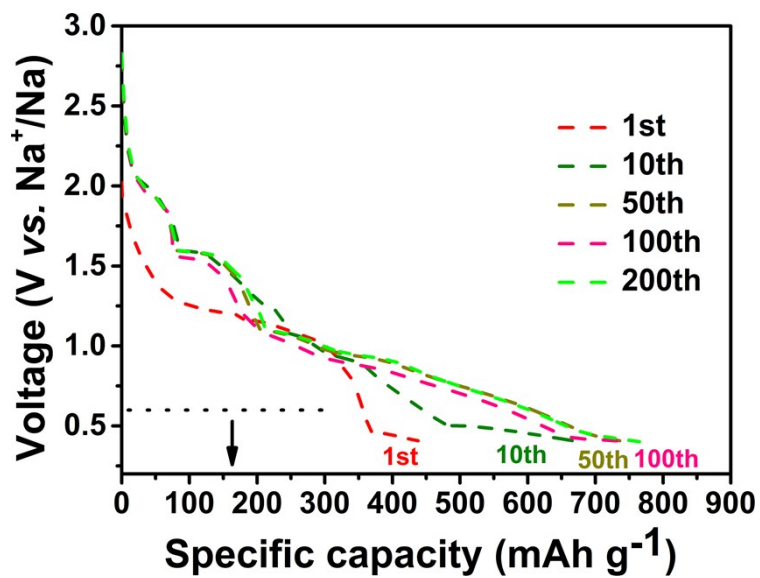

**Fig. S7** Discharge profiles of N-CoS<sub>2</sub>@C electrode at 1<sup>st</sup>, 10<sup>th</sup>, 50<sup>th</sup>, 100<sup>th</sup> and 200<sup>th</sup>.

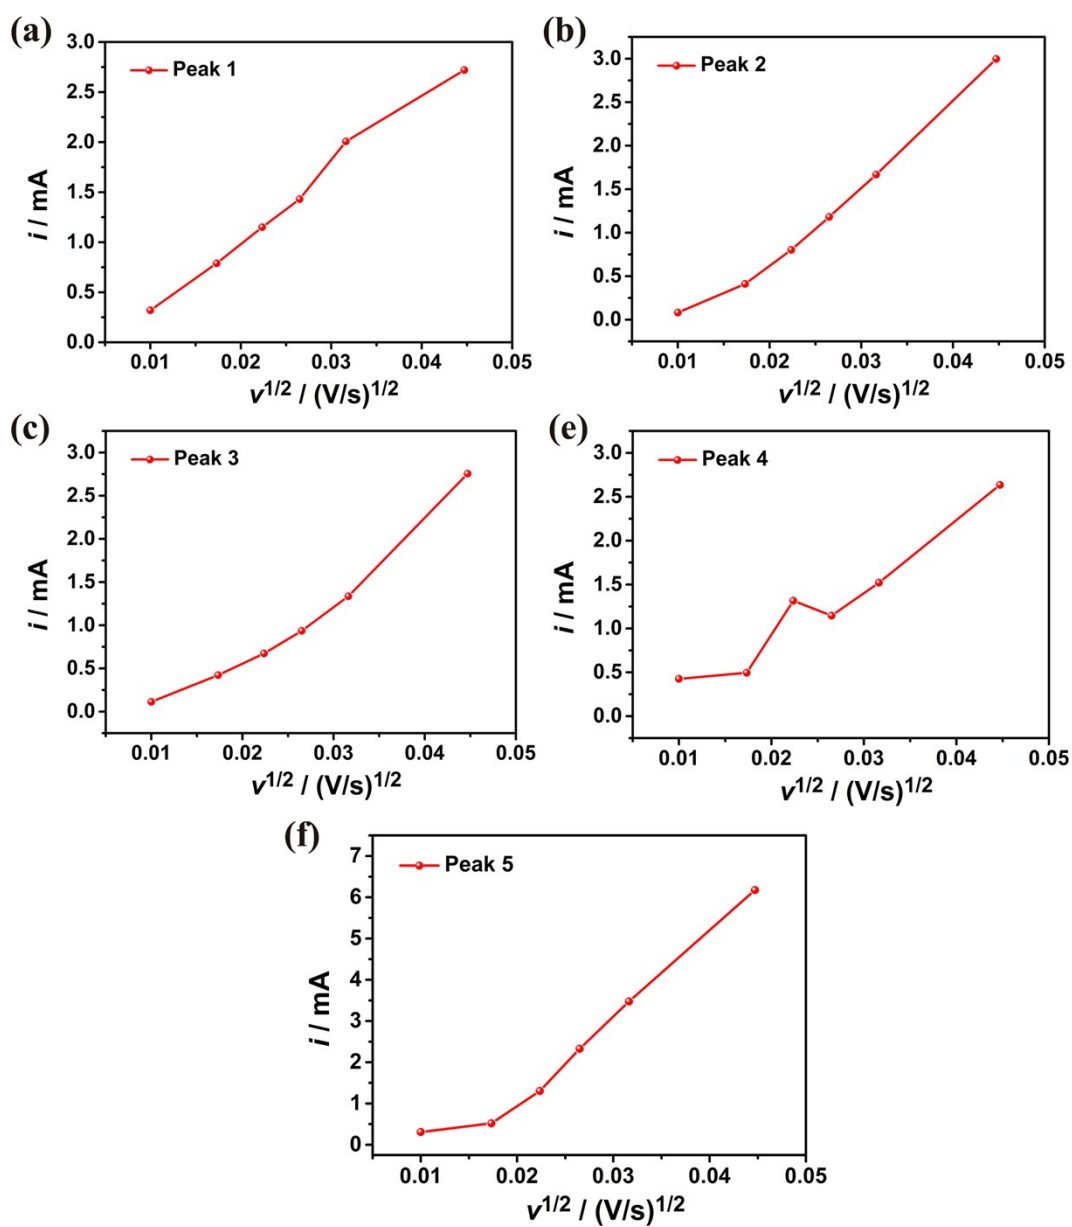

**Fig. S8**  $i$  vs.  $v^{1/2}$  plots at each redox peak of CV curves (peak current  $i$ , scan  $v$ ).

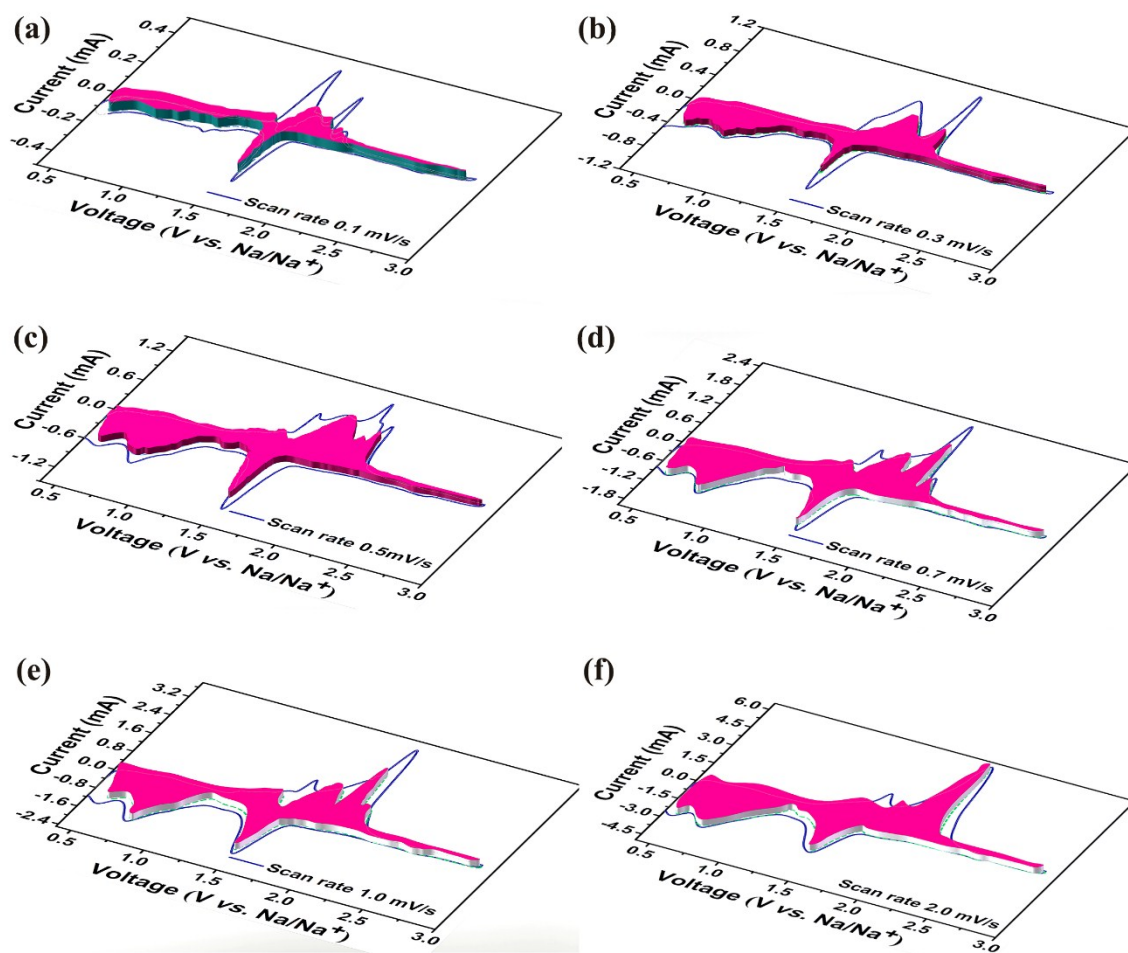

**Fig. S9** CV curve with the pseudocapacitive fraction shown by the red region at various scan rates.

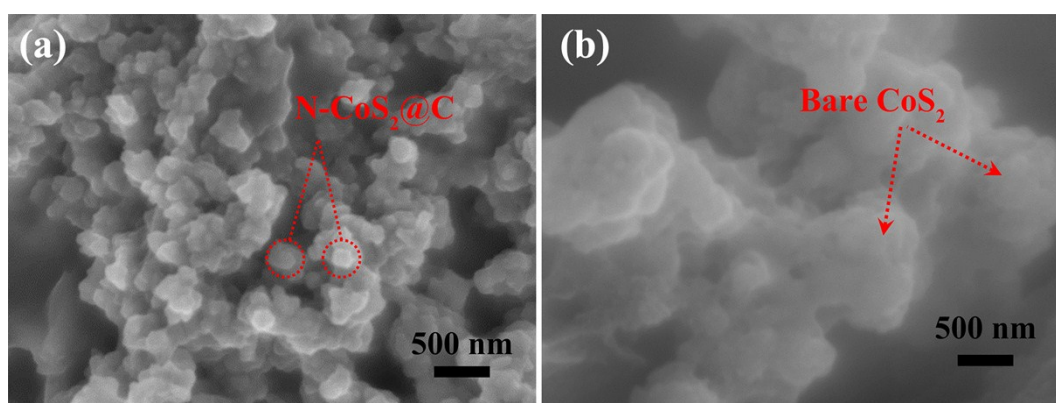

**Fig. S10** SEM images of (a) N- CoS<sub>2</sub>@C electrode and (b) bare CoS<sub>2</sub> electrode after 100 cycles at a current density of 1 A g<sup>-1</sup>.

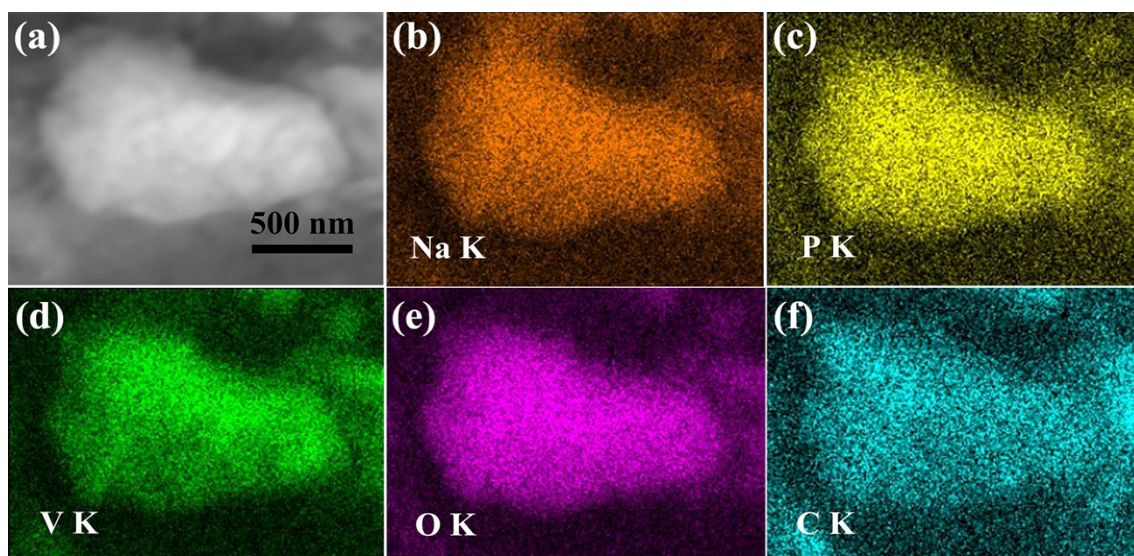

Fig. S11 EDS elemental mapping of NVP@C composites.

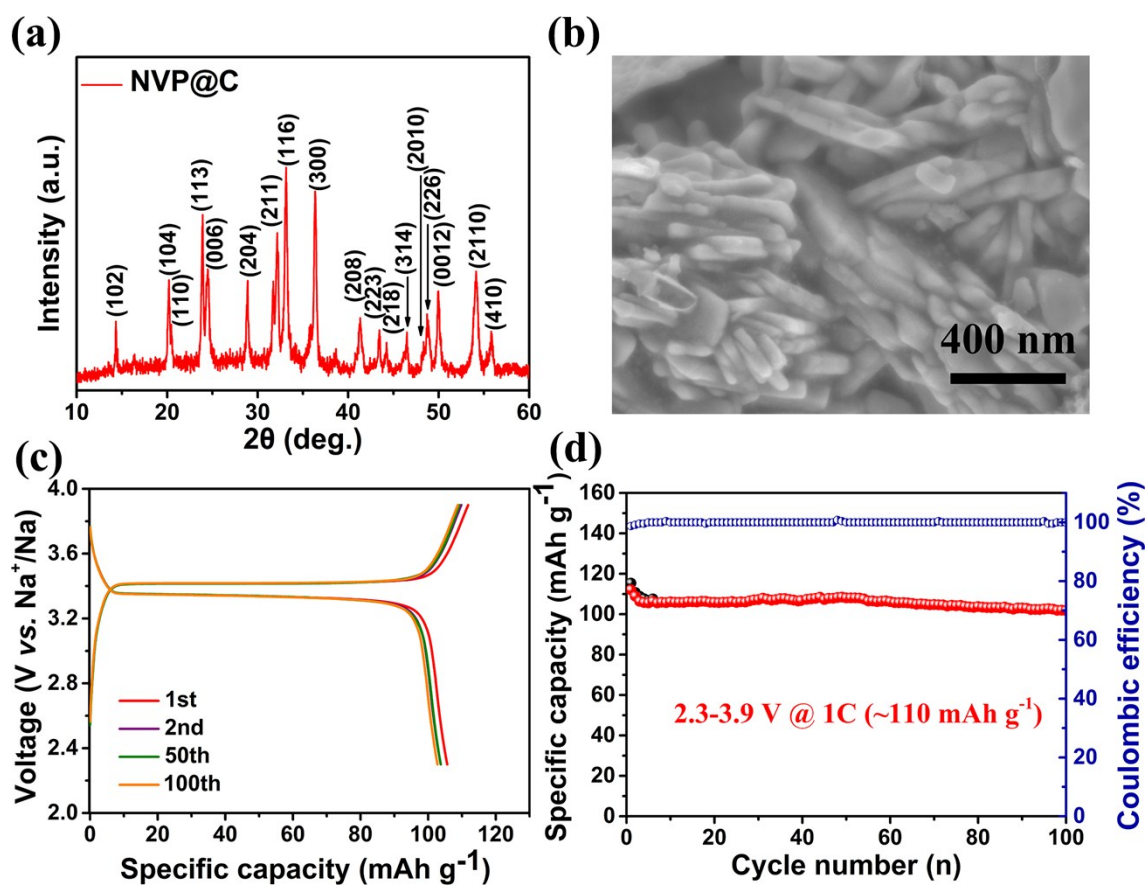

Fig. S12 (a) XRD pattern, (b) SEM image of NVP@C; (c) charge/discharge curves and (b) cycling performance of NVP@C electrode at a current density of 1 C.
